# Supplementary material for: Exploring sunflower responses to Sclerotinia head rot at early stages of infection using RNA-seq analysis
Source: PubMed Central journal article supplement (PMC7414910; doi:10.1038/s41598-020-70315-4), 2020-08-07
Supplement: 41598_2020_70315_MOESM1_ESM.pdf [file 41598_2020_70315_MOESM1_ESM.pdf]

## Exploring sunflower responses to Sclerotinia Head Rot at early stages of infection using RNA-seq analysis

Mónica I. Fass<sup>1,2†\*</sup>, Máximo Rivarola<sup>1,2†</sup>, Guillermo F. Ehrenbolger<sup>1,2</sup>, Carla A. Maringolo<sup>3</sup>, Juan F. Montecchia<sup>1,2</sup>, Facundo Quiroz<sup>3</sup>, Francisco García-García<sup>4</sup>, Joaquín Dopazo Blázquez<sup>5,6</sup>, Horacio E. Hopp<sup>1,2</sup>, Ruth A. Heinz<sup>1,2</sup>, Norma B. Paniego<sup>1,2γ</sup>, Verónica V. Lia<sup>1,2γ</sup>

<sup>1</sup>Instituto de Biotecnología, Centro de Investigaciones en Ciencias Agronómicas y Veterinarias, Instituto Nacional de Tecnología Agropecuaria, Hurlingham, Buenos Aires, Argentina.

<sup>2</sup>Consejo Nacional de Investigaciones Científicas y Técnicas, Ciudad Autónoma de Buenos Aires, Argentina

<sup>3</sup>Estación Experimental Agropecuaria INTA Balcarce, Balcarce, Buenos Aires, Argentina

<sup>4</sup>Bioinformatics and Biostatistics Unit, Principe Felipe Research Center, Valencia, Spain

<sup>5</sup>Clinical Bioinformatics Area. Fundación Progreso y Salud (FPS). CDCA, Hospital Virgen del Rocío. 41013. Sevilla. Spain

<sup>6</sup>INB-ELIXIR-es, FPS, Hospital Virgen del Rocío, Sevilla, 42013, Spain.

†γ These authors contributed equally to this work

\*Correspondence and requests should be addressed to MF (email: fass.monica@inta.gob.ar)

## Supplementary Figures

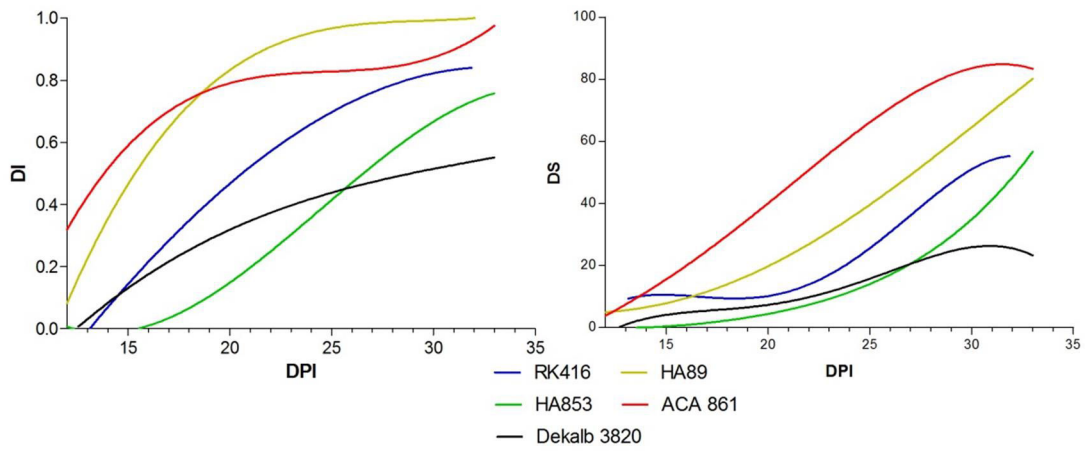

**Supplementary Figure S1.** Smoothed curves of progression of disease incidence (DI; left panel) and disease severity (DS; right panel) over time.

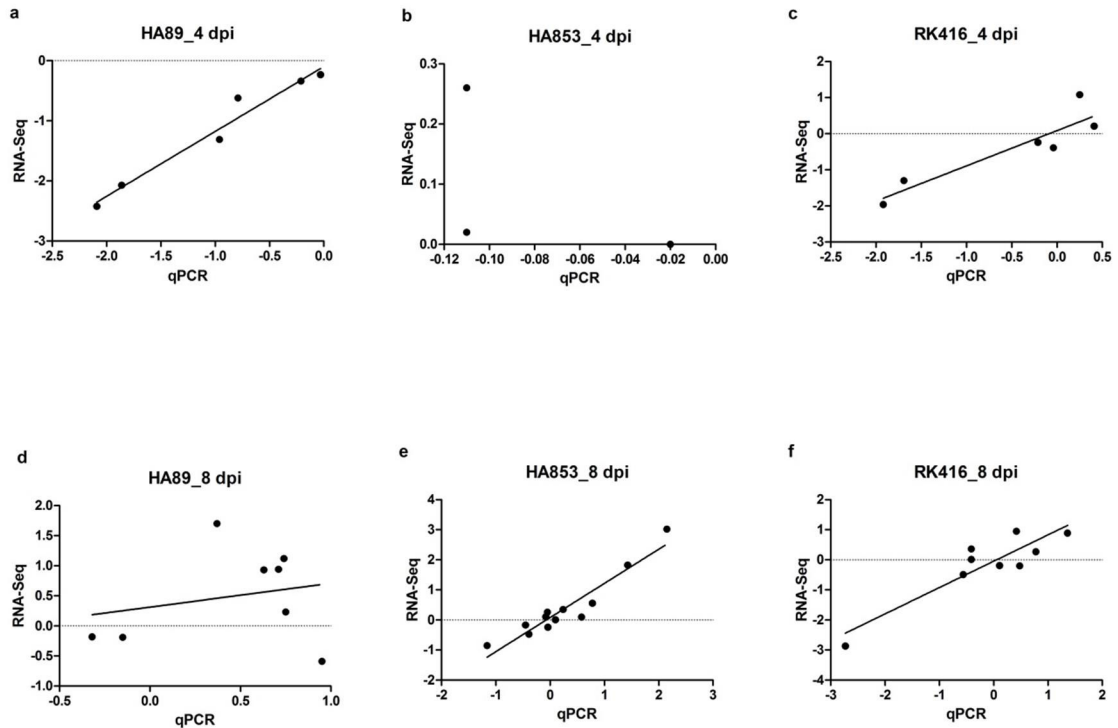

**Supplementary Figure S2.** Correlation of gene expression ratios between RNA-Seq and qPCR data. A, B, C: HA89, HA853 and RK416 at 4 dpi, respectively. D, E, F: HA89, HA853 and RK416 at 8 dpi, respectively.

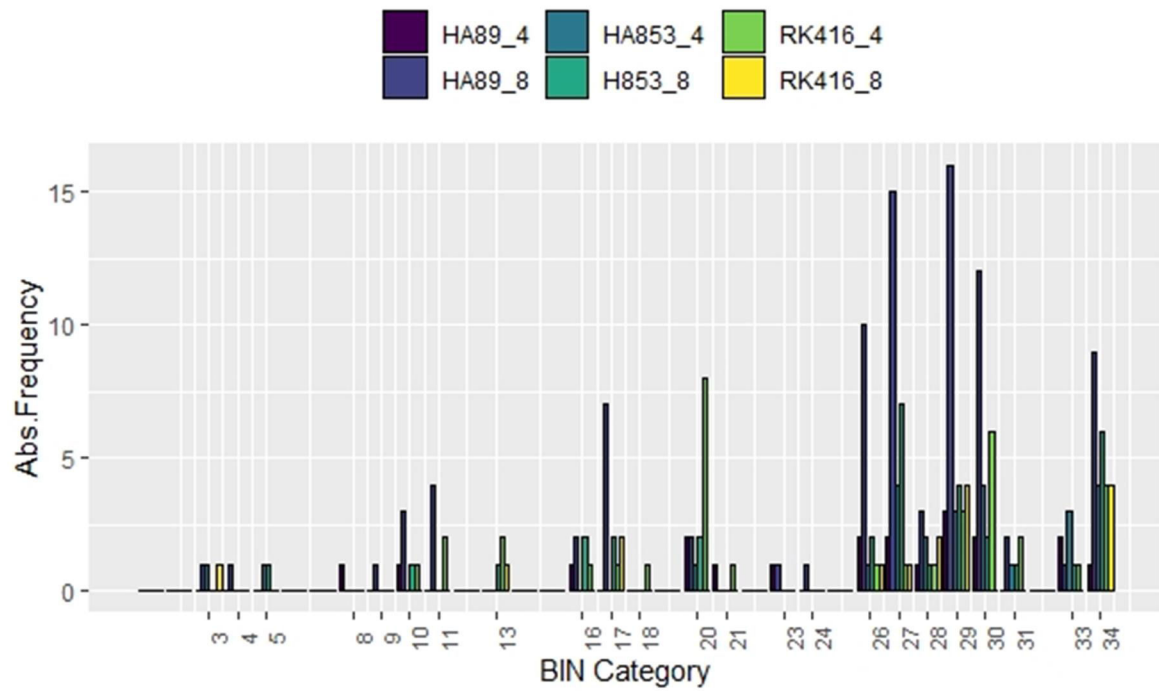

**Supplementary Figure S3.** Classification of DEGs of the different IL-time point combinations in MapMan categories. Numbers correspond to MapMan categories: 3: minor CHO metabolism; 4: glycolysis; 5: fermentation; 8: TCA / org transformation; 9: mitochondrial electron transport / ATP synthesis; 10: cell wall; 11: lipid metabolism; 13: amino acid metabolism; 16: secondary metabolism; 17: hormone metabolism; 18: Co-factor and vitamine metabolism; 20: stress; 21: redox; 23: nucleotide metabolism; 24: Biodegradation of Xenobiotics; 26: misc; 27: RNA; 28: DNA; 29: protein; 30: signalling; 31: cell; 33: development; 34: transport.
